# Supplementary material for: Shoe-Integrated Sensor System for Diagnosis of the Concomitant Syndesmotic Injury in Chronic Lateral Ankle Instability: A Prospective Double-Blind Diagnostic Test
Source: MDPI journal article supplement (doi:10.3390/nano13091539), 2023-05-04
Supplement: s1 [file s1]

Table S1. Peak pressure ratio measured by SISS system and calculated predicted probabilities in 27 CLAI patients.

| ID | Disease | HP          | HA          | ML          | M5          | M3          | M1          | T1          | LOGREGR_Pred |
|----|---------|-------------|-------------|-------------|-------------|-------------|-------------|-------------|--------------|
| 1  | 0       | 0.904376399 | 1.15458114  | 0.713068786 | 0.943664601 | 1.032783423 | 0.700444994 | 1.557543197 | 0.69409781   |
| 2  | 1       | 0.802345726 | 0.852752511 | 0.771263762 | 0.97387009  | 0.656878041 | 0.626121477 | 0.304067695 | 0.98966388   |
| 3  | 0       | 0.939239289 | 1.091250473 | 0.790205096 | 0.869520817 | 0.97732204  | 0.723975103 | 1.043787614 | 0.64736477   |
| 4  | 1       | 0.978784839 | 1.011898616 | 0.828674011 | 0.748602235 | 0.737243229 | 1.018070876 | 0.485736007 | 0.86137324   |
| 5  | 1       | 1.07765745  | 0.894188562 | 0.597311911 | 1.044747806 | 1.045982907 | 1.179512203 | 1.484290514 | 0.78244472   |
| 6  | 1       | 0.961186212 | 1.14802057  | 0.638759891 | 0.929359839 | 1.015241452 | 0.75969124  | 0.539833582 | 0.65500446   |
| 7  | 1       | 0.962053637 | 1.064412055 | 0.548516371 | 0.639224494 | 1.073699149 | 0.406042358 | 1.01807141  | 0.62841501   |
| 8  | 1       | 0.986531878 | 0.705535437 | 1.176253065 | 1.030490122 | 0.896937012 | 1.159569525 | 0.912358739 | 0.47599898   |
| 9  | 0       | 1.098934745 | 0.946179274 | 1.003195855 | 1.086412927 | 0.970064557 | 1.364343218 | 0.802573154 | 0.38905980   |
| 10 | 1       | 0.989939706 | 0.899106989 | 0.62549077  | 0.810730627 | 0.981101724 | 0.586301109 | 1.172388778 | 0.88425805   |
| 11 | 0       | 0.950897779 | 0.544248599 | 0.878962824 | 1.013721652 | 1.004519359 | 1.118642331 | 0.95798625  | 0.50635406   |
| 12 | 0       | 0.84804154  | 0.802138685 | 2.005865381 | 0.7378201   | 0.81689527  | 0.110566906 | NA          | 0.07981630   |
| 13 | 0       | 0.987752752 | 1.636057127 | 0.479076671 | 0.891554038 | 1.085951556 | 0.813737018 | 0.883902498 | 0.47415466   |
| 14 | 0       | 0.99776292  | 1.185161962 | 1.3321073   | 1.018408641 | 0.969067218 | 1.280042498 | 0.73909726  | 0.05675877   |
| 15 | 0       | 0.913114642 | 0.826095452 | 1.263778076 | 1.044765729 | 0.981144239 | 1.139694923 | 1.198713309 | 0.15479330   |
| 16 | 1       | 1.045093099 | 0.991741516 | 1.181919592 | 0.920010103 | 0.909201752 | 0.668564441 | 1.1323584   | 0.68792902   |
| 17 | 0       | 0.959147072 | 1.204964988 | 0.895341342 | 0.839120885 | 1.009591553 | 0.823829899 | 1.123595652 | 0.33061976   |
| 18 | 1       | 0.899196417 | 0.738913144 | 0.687866876 | 1.111027194 | 0.977894751 | 0.800407337 | 0.851480078 | 0.88769999   |
| 19 | 1       | 1.035220693 | 1.057507955 | 0.387726509 | 0.630295592 | 0.680596121 | 0.583339946 | 0.867641979 | 0.99695217   |
| 20 | 1       | 0.949658831 | 1.258216413 | 1.135738821 | 0.980318421 | 0.846697493 | 0.878097362 | 1.205800867 | 0.66228519   |
| 21 | 0       | 1.403494425 | 1.701857631 | 1.188975752 | 0.967479299 | 0.841069414 | 0.76107797  | 0.998779697 | 0.90277709   |

|    |   |             |             |             |             |             |             |             |            |
|----|---|-------------|-------------|-------------|-------------|-------------|-------------|-------------|------------|
| 22 | 1 | 1.055997924 | 1.007478825 | 1.007657592 | 1.193814234 | 1.070703864 | 0.819669808 | 0.722414622 | 0.52566602 |
| 23 | 1 | 0.936694496 | 0.971966443 | 0.846393835 | 0.688881687 | 0.963326174 | 0.912075496 | 1.385083262 | 0.37989367 |
| 24 | 1 | 1.234791795 | 1.741118447 | 1.092351637 | 1.046029283 | 0.977932257 | 0.90735962  | 1.055739031 | 0.51825922 |
| 25 | 0 | 0.905863226 | 1.077043568 | 1.342952806 | 1.149373954 | 1.020507025 | 0.644619122 | 1.121016991 | 0.27765857 |
| 26 | 0 | 0.828632489 | 0.466172636 | 1.280594536 | 1.024908787 | 0.988583147 | 1.038412426 | 1.221479884 | 0.17240373 |
| 27 | 1 | 1.175349749 | 1.85247218  | 1.186727762 | 1.168373132 | 1.03299746  | 0.856189289 | 1.375291247 | 0.37829778 |

Disease: 0 = normal syndesmosis; 1 = syndesmotic injury;

LOGREGR\_Pred: predicted probability calculated by logistic regression;

NA: not applicable.
